# Supplementary material for: Accelerated Gray and White Matter Deterioration With Age in Schizophrenia
Source: Atypon-hosted journal article supplement (doi:10.1176/appi.ajp.2016.16050610), 2016-12-06
Supplement: appi.ajp.2016.16050610.ds001.pdf [file appi.ajp.2016.16050610.ds001.pdf]

 


Psychiatry Online
